# Supplementary material
Source: HighWire-hosted journal article supplement (https://erj.ersjournals.com/content/60/2/2101821)
Supplement: inline-supplementary-material-1 [file inline-supplementary-material-1.pdf]

## Supplemental Methods and Results

### Cardiopulmonary Exercise Test Measurements:

Oxygen Uptake Efficiency Slope (OUES) was defined as the slope of  $\text{VO}_2$  plotted against the semilog of total minute ventilation (VE).<sup>1</sup> % predicted peak  $\text{VO}_2$  was calculated using the Wasserman prediction equations.<sup>2</sup>  $\text{VO}_2/\text{work}$  was calculated as the slope of the regression line between work (x-axis) and  $\text{VO}_2$  (y-axis) starting 1-min in to incremental ramp exercise. VE was calculated as ventilation per minute (L/min) at the ventilatory anaerobic threshold (AT).<sup>3</sup> The ventilatory AT was measured by the V-slope method and was adjudicated by the study PI if values from two experienced readers differed by more than 5%.  $\text{VO}_2$  was also collect at AT. The oxygen pulse slope was calculated by the slope of  $\text{VO}_2$  versus heart rate.<sup>3</sup> For breathing reserve, maximum voluntary ventilation (MVV) was calculated as  $35 \times \text{FEV}_1$  as baseline. The equation  $100 \times (\text{MVV} - \text{VE}) / \text{MVV}$ , where VE was collected at either AT or peak exercise.

### Pulmonary Function Test Measurements:

Participants with  $\text{FEV}_1/\text{FVC} < 0.70$  and % predicted  $\text{FEV}_1 \geq 80\%$  and  $50\% \leq \text{FEV}_1 < 80\%$  were deemed to have obstructive lung disease classified as GOLD stage 1 and 2, respectively.<sup>4,5</sup> In addition, participants with  $\text{FEV}_1/\text{FVC} < 0.7$  and % predicted  $\text{FVC} < 80\%$  were defined as having restrictive lung physiology<sup>6</sup>

### Computed Tomography Measurements:

CT images were acquired utilizing a 64-detector row scanner (Discovery, GE healthcare, Waukesha, WI, USA) with acquisition parameters of 120kVp, 300-350mA (based on body weight), 350ms rotation time, and 0.625mm section thickness. All scans were performed in the supine position, during inspiration, and without contrast. These CTs were visually assessed for radiographic changes using a modified sequential

reading method by three board-certified radiologists.<sup>7</sup> Emphysema was defined as present or absent based on visual inspection.<sup>8</sup> Interstitial lung abnormalities (ILA) were defined as non-dependent ground-glass, reticular abnormalities, diffuse centrilobular nodularity, nonemphysematous cysts, honeycombing or traction bronchiectasis that affected >5% of any lung zone.<sup>9</sup> Patchy, focal, or unilateral abnormalities were considered to be “indeterminate.”<sup>9</sup>

#### Pulmonary Blood Vessel Measurements:

Vascular image analysis was performed in the Applied Chest Imaging Laboratory at Brigham and Women’s Hospital using Chest Imaging Platform ([www.chestimaging.platform.org](http://www.chestimaging.platform.org)).<sup>10</sup> Using an automated algorithm, three-dimensional reconstructions of the pulmonary vasculature were created using scale-space particles method.<sup>10,11</sup> As previously described, the vessel size at a certain location within the pulmonary system is determined by the particle scale information.<sup>10,11</sup>

#### Age interaction Results:

To further address the effect of age among non-smokers, we assessed age by quartile within the cohort through unadjusted scatter plots colored by age category (See Supplemental Figure 1) and linear models with an interaction between the age quartiles and pulmonary function (FEV<sub>1</sub>, FVC, and DLCO). Based on inspection of the scatterplots, those in the older age quartiles have on average a lower peak VO<sub>2</sub>, but the effects of the pulmonary function variables on Peak VO<sub>2</sub> is constant across age quartiles (as seen from the parallel slopes in the scatterplots). This conclusion is further supported by the lack of significant p-values in the interaction models (See Supplemental Table 1; minimum p-value = 0.07). Our data does not provide evidence of differential effects of pulmonary function on peak VO<sub>2</sub> by age category.

In addition, we assessed age by quartile within the cohort through unadjusted scatter plots by age category (Supplemental Figure 2) and linear models with an interaction between the age quartiles and pulmonary blood vessel measurements (BV5 and TBV). Based on inspection of the scatterplots, those in the older age quartiles have on average a lower peak VO<sub>2</sub>, but the effects of the blood vessel volume

variables on Peak VO<sub>2</sub> is constant across age quartiles. This conclusion is further supported by the lack of significant p-values in the interaction model (See Supplemental Table 1; minimum p-value = 0.6). Based on our data, age does not seem to modify the effects of blood vessel volume on peak VO<sub>2</sub>.

#### References:

1. Hollenberg M, Tager IB. Oxygen uptake efficiency slope: an index of exercise performance and cardiopulmonary reserve requiring only submaximal exercise. *J Am Coll Cardiol*. 2000;36(1):194-201.
2. Ahmadian HR, Sclafani JJ, Emmons EE, Morris MJ, Leclerc KM, Slim AM. Comparison of Predicted Exercise Capacity Equations and the Effect of Actual versus Ideal Body Weight among Subjects Undergoing Cardiopulmonary Exercise Testing. *Cardiol Res Pract*. 2013;2013:940170.
3. Mezzani A. Cardiopulmonary Exercise Testing: Basics of Methodology and Measurements. *Ann Am Thorac Soc*. 2017;14(Supplement\_1):S3-S11.
4. Burkes RM, Donohue JF. An Update on the Global Initiative for Chronic Obstructive Lung Disease 2017 Guidelines With a Focus on Classification and Management of Stable COPD. *Respir Care*. 2018;63(6):749-758.
5. Mirza S, Clay RD, Koslow MA, Scanlon PD. COPD Guidelines: A Review of the 2018 GOLD Report. *Mayo Clin Proc*. 2018;93(10):1488-1502.
6. Johnson JD, Theurer WM. A stepwise approach to the interpretation of pulmonary function tests. *Am Fam Physician*. 2014;89(5):359-366.
7. Araki T, Nishino M, Zazueta OE, et al. Paraseptal emphysema: Prevalence and distribution on CT and association with interstitial lung abnormalities. *Eur J Radiol*. 2015;84(7):1413-1418.
8. Synn AJ, Li W, San Jose Estepar R, et al. Radiographic pulmonary vessel volume, lung function and airways disease in the Framingham Heart Study. *Eur Respir J*. 2019;54(3).
9. Hunninghake GM, Hatabu H, Okajima Y, et al. MUC5B promoter polymorphism and interstitial lung abnormalities. *N Engl J Med*. 2013;368(23):2192-2200.
10. Estepar RS, Kinney GL, Black-Shinn JL, et al. Computed tomographic measures of pulmonary vascular morphology in smokers and their clinical implications. *Am J Respir Crit Care Med*. 2013;188(2):231-239.
11. Estepar RS, Ross JC, Krissian K, Schultz T, Washko GR, Kindlmann GL. Computational Vascular Morphometry for the Assessment of Pulmonary Vascular Disease Based on Scale-Space Particles. *Proc IEEE Int Symp Biomed Imaging*. 2012:1479-1482.
