# Supplementary material
Source: HighWire-hosted journal article supplement (https://erj.ersjournals.com/content/60/2/2101821)

Supplemental Figure Captions:

**Supplemental Figure S1: Association of pulmonary function measures with peak  $\text{VO}_2$  by age quartiles.** The plots include data points colored by age quartile and simple linear models fit and colored by age quartile.

**Supplemental Figure S2: Association of blood vessel volume measures with peak  $\text{VO}_2$  by age quartiles.** The plots include data points colored by age quartile and simple linear models fit and colored by age quartile.

Supplemental Figure S1

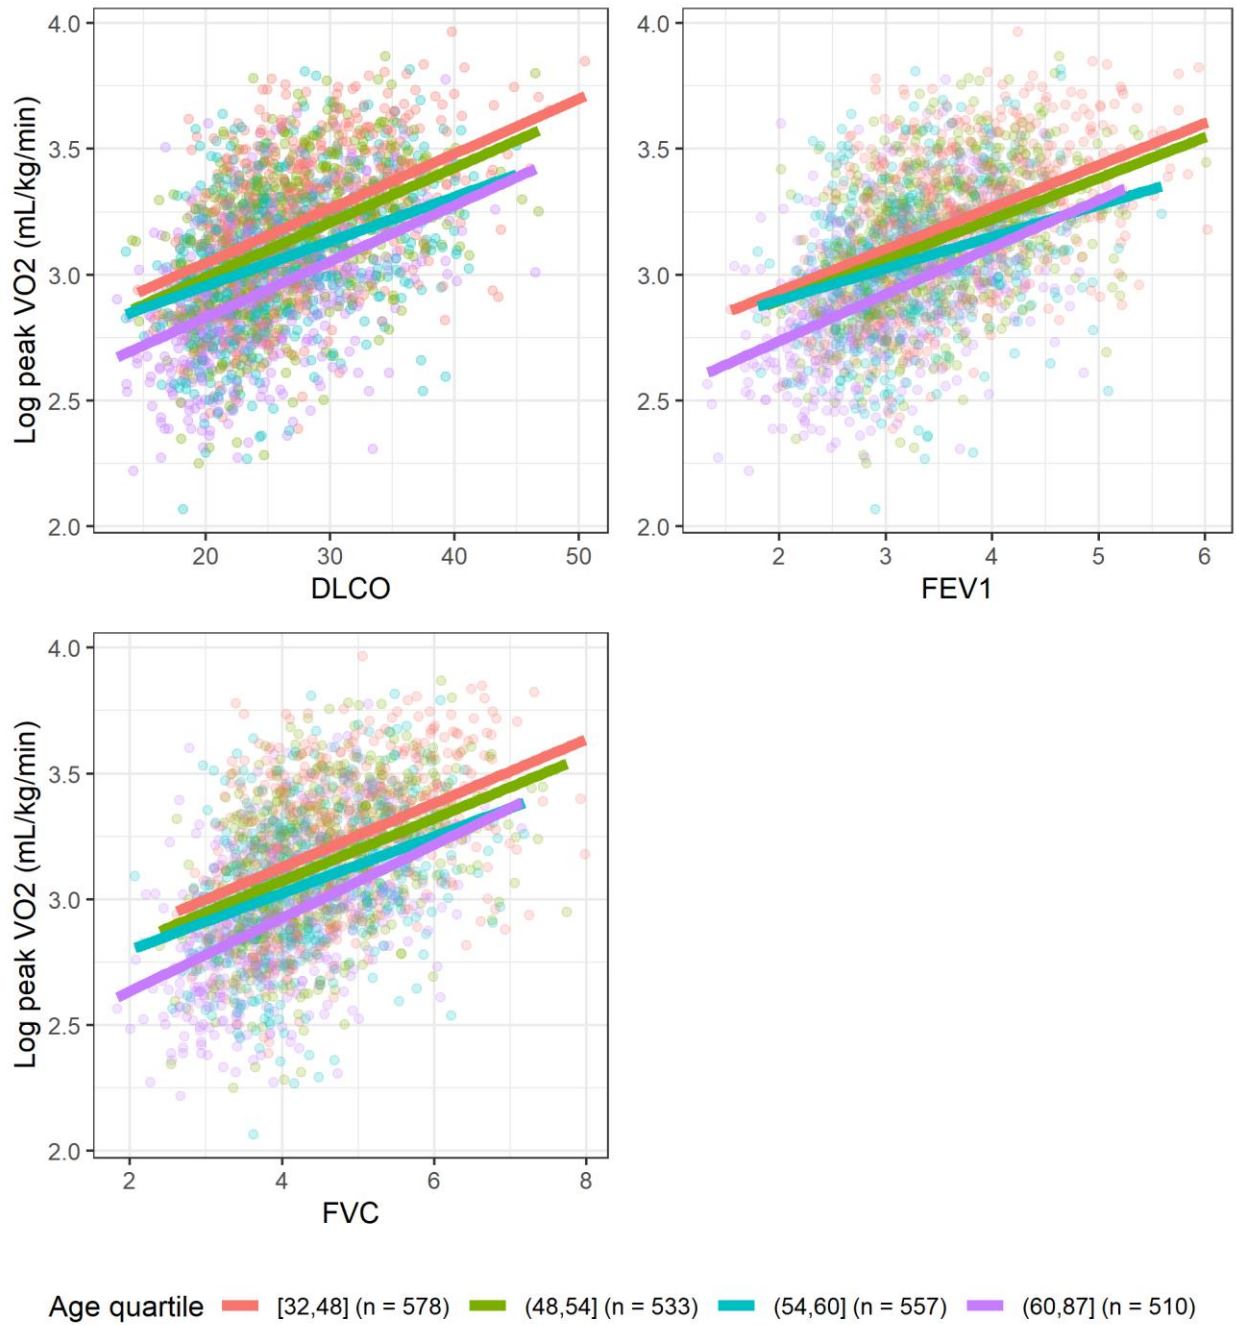

Supplemental Figure S2:

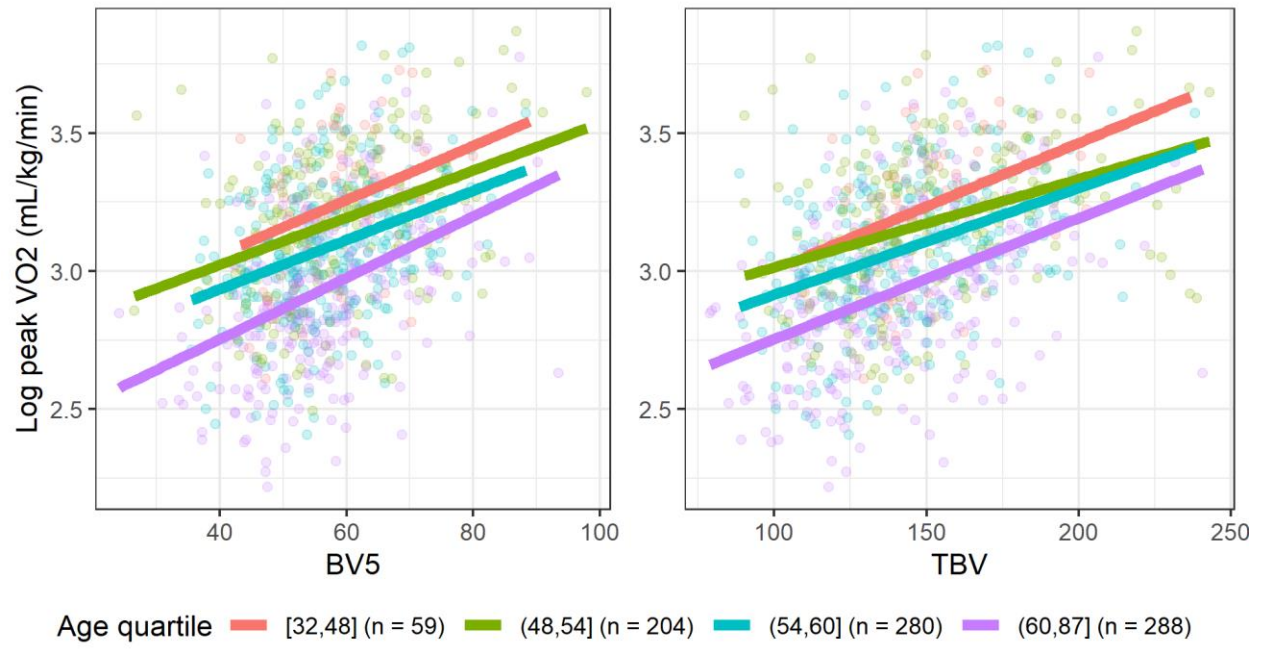

Supplement: inline-supplementary-material-2 [file inline-supplementary-material-2.pdf]
